# Supplementary material for: Large-area, three-dimensional interconnected graphene oxide intercalated with self-doped polyaniline nanofibers as a free-standing electrocatalytic platform for adenine and guanine
Source: Royal Society of Chemistry journal article supplement (doi:10.1039/c3tb20171f), 2013-01-01
Supplement: c3tb20171f.pdf [file c3tb20171f.pdf]

## Supplied Materials

# **Large–area, three–dimensional interconnected graphene oxide intercalated with self–doped polyaniline nanofibers as a free–standing electrocatalytic platform for adenine and guanine**

**Tao Yang, Qian Guan, Qianhe Li, Le Meng, Longlong Wang, Chenxia Liu, Kui Jiao\***

*Key Laboratory of Eco-Chemical Engineering of Ministry of Education, College of Chemistry and Molecular Engineering, Qingdao University of Science and Technology, Qingdao 266042, China*

\* Corresponding author. Tel: +86-532-84022665; fax: +86-532-84022937.

*E-mail address:* kjiao@qust.edu.cn (K. Jiao).

## 1. XPS characterization of GNO-SPAN

The C 1s XPS spectrum of GNO-SPAN shown in Figure S1A clearly indicated a certain extent of oxidation of graphite upon chemical exfoliation. The three prominent peaks (284.5, 285.3, 287.0 eV) observed on GNO-SPAN present the existence of a certain amount of functional groups on the surface[1,2]. From N 1s XPS spectrum (Figure S1B), the benzenoid amine with binding energy (BE) centered at 399.5 eV and the nitrogen cationic radical ( $N^+$ ) with BE at 401.9 eV are clearly identified[3]. As shown in Fig. S1C (S 2p XPS spectrum), the S 2p peaks appeared at 167.4 eV and 168.4 eV are consistent with the existence of  $-SO_3^-$  groups in the GNO-SPAN, which is further confirmed by O 1s XPS spectrum (Fig. S1D, 532.7 eV) [4]. In addition, the peak at 531.1 eV in O 1s XPS spectrum is corresponding to C-O entity[5].

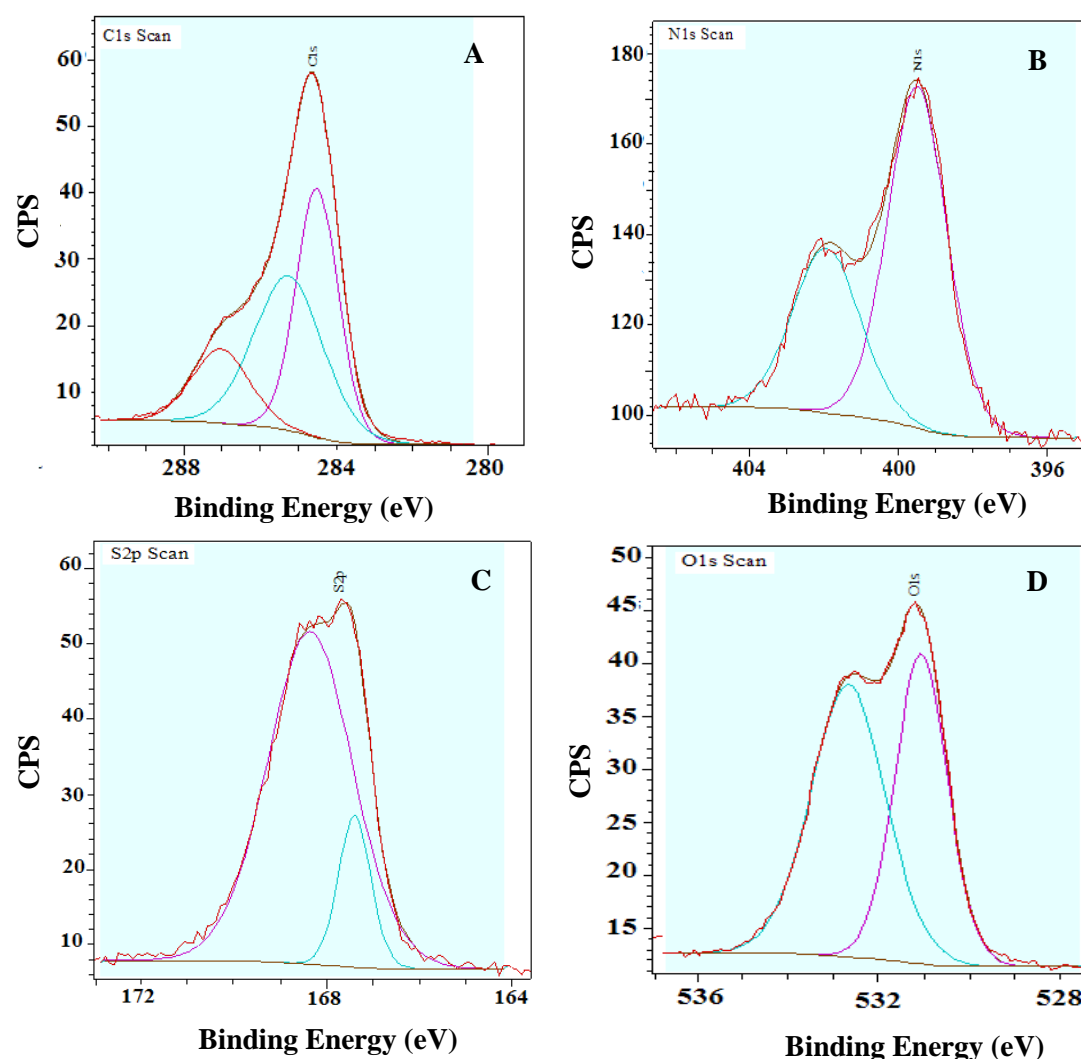

Fig. S1 The C 1s(A), N 1s(B), O 1s (C) and S 2p (D) XPS spectrum of GNO-SPAN. Note: count per second (CPS)

- 1 Y. Wang, S. Zhang, D. Du, Y. Y. Shao, Z. H. Li, J. Wang, M. H. Engelhard, J. H. Li and Y. H. Lin, *J. Mater. Chem.*, 2011, **21**, 5319.
- 2 C. Z. Zhu, S. J. Guo, Y. X. Fang, L. Han, E. K. Wang and S. J. Dong, *Nano Res.*, 2011, **4**, 648.
- 3 X. M. Feng, R. M. Li, Y. W. Ma, R. F. Chen, N. E. Shi, Q. L. Fan and W. Huang, *Adv. Funct. Mater.*, 2011, **21**, 2989.
- 4 S. G. Wu, T. L. Wang, Z. Y. Gao, H. H. Xu, B. N. Zhou and C. Q. Wang, *Biosens. Bioelectron.*, 2008, **23**, 1776.
- 5 S. S. Gupta, T. S. Sreeprasad, S. M. Maliyekkal, S. K. Das and T. Pradeep, *ACS Appl. Mater. Interfaces*, 2012, **4**, 4156.

## 2. Optimization of determination conditions

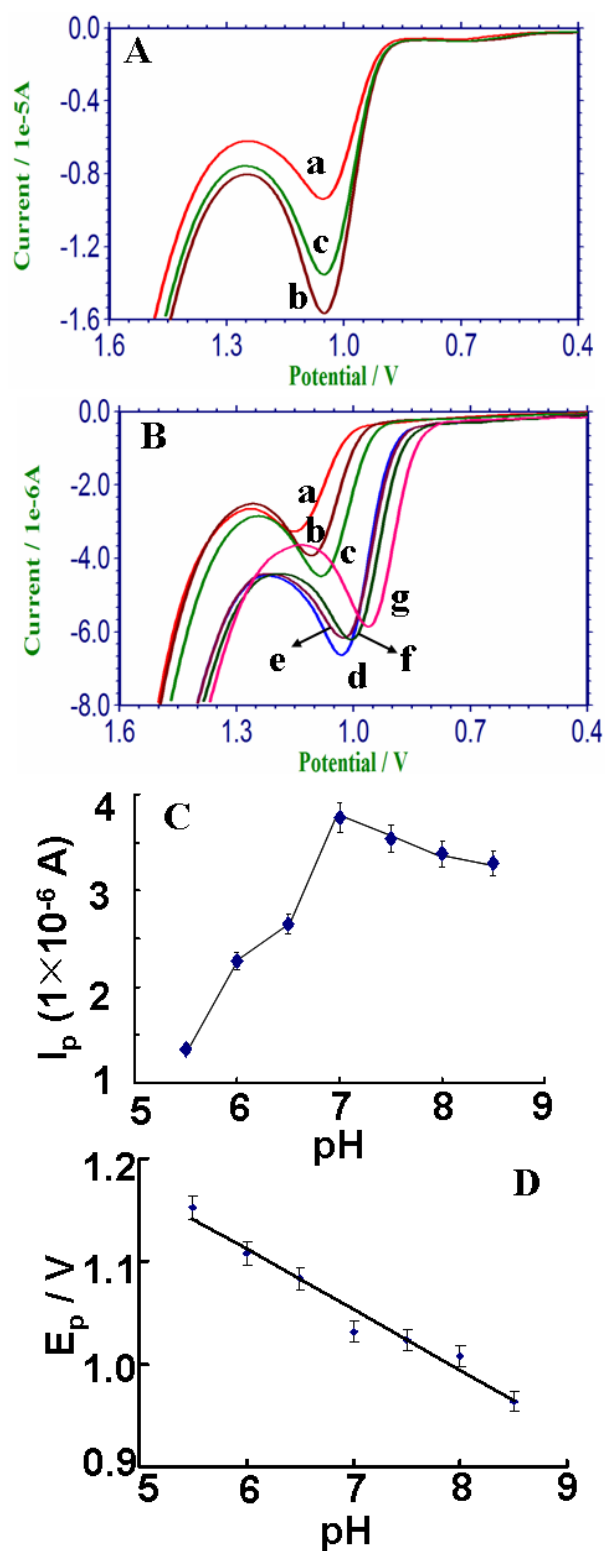

**Fig. S2** (A) Representative DPV of  $2 \times 10^{-4}$  mol/L adenine in ABS (a), B-R (b) and PBS (c) buffer solutions. (B), (C), (D) The effect of pH on the electrooxidation of  $5.0 \times 10^{-5}$  mol/L adenine. (a)–(g) 5.5, 6.0, 6.5, 7.0, 7.5, 8.0 and 8.5. *Note:* Each point is the mean of three measurements, and the error bars correspond to the standard deviation.

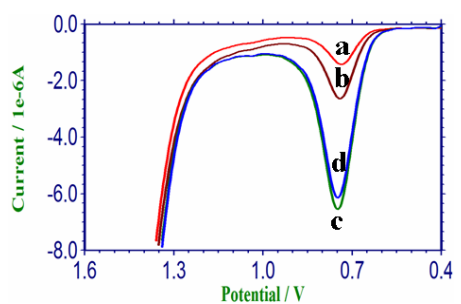

**Fig. S3** Representative DPV in B–R solution with  $2 \times 10^{-4}$  mol/L guanine recorded at GNO–SPAN with different ultrasonic time s (a) 10 min, (b) 20 min, (c) 30 min, (d) 40 min.

### 3. Determinations of guanine and adenine

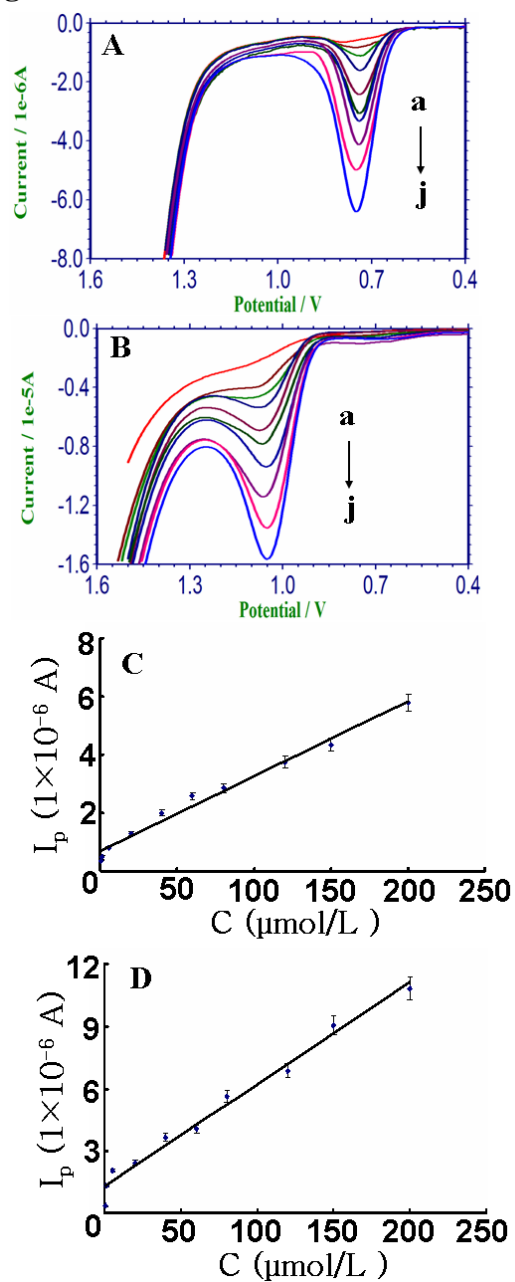

**Fig. S4** Representative DPV of guanine (A) and adenine (B) (from a to j: 0.5, 1, 5, 20, 40, 60, 80, 120, 150 and 200  $\mu\text{mol/L}$ ) at GNO-SPAN/CPE in B-R. Calibration curves of the oxidation peak current versus different concentration of guanine (C) and adenine (D), respectively. *Note:* Each point is the mean of three measurements, and the error bars correspond to the standard deviation.

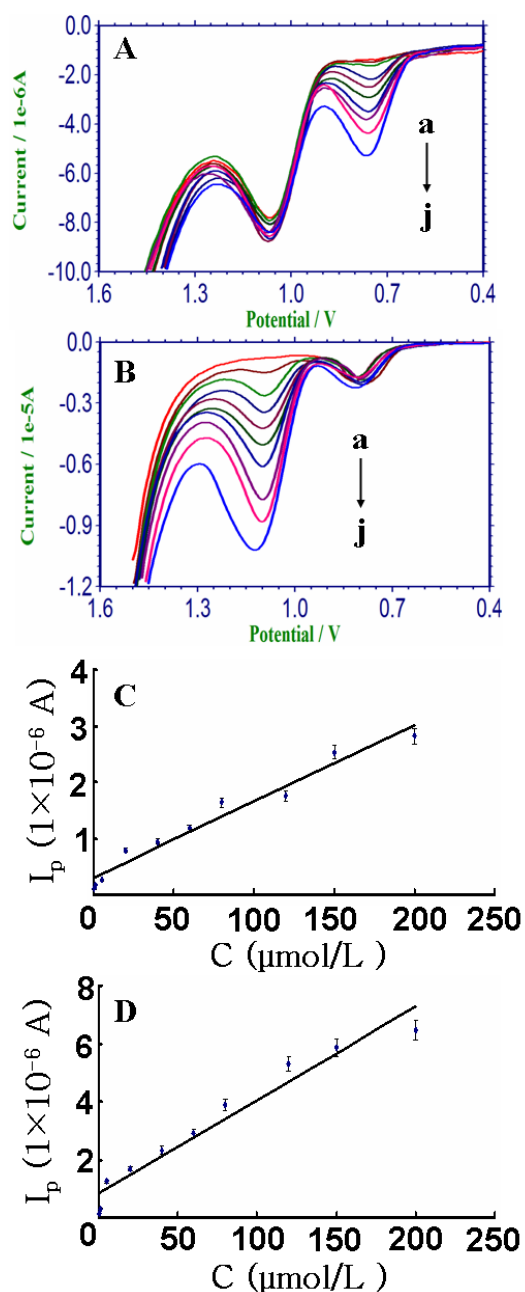

**Fig. S5** (A) Representative DPV of guanine (from a to j: 0.5, 1, 5, 20, 40, 60, 80, 120, 150 and 200  $\mu\text{mol/L}$ ) in B-R (pH 7.0) with coexistence of  $5.0 \times 10^{-5}$  mol/L adenine at GNO-SPAN/CPE. (B) Representative DPV of adenine (from a to j: 0.5, 1, 5, 20, 40, 60, 80, 120, 150 and 200  $\mu\text{mol/L}$ ) in B-R (pH 7.0) with coexistence of  $5.0 \times 10^{-5}$  mol/L guanine at GNO-SPAN/CPE. (C) Calibration curve of guanine. (D) Calibration curve of adenine. *Note:* Each point is the mean of three measurements, and the error bars correspond to the standard deviation.
